# Supplementary material for: Grain Yield Performance of Hybrid Rice in Multi-Environment Tests for Thirty-two Years in India
Source: Research Square preprint supplement (doi:10.21203/rs.3.rs-122407/v1), 2020-12-10
Supplement: Supplementary file 1 [file 62d2cc4711ae2efc640d306e.xlsx]

## Sheet: Sheet1
SHEET 1. Particulars of trials with hybrid (F1) genotypes along with inbred local variety checks in different maturity groups in the all-India co-ordinated rice improvement experiments performed between 1988 and 2019*
Mean grain yields of Top3 hybrid F1 genotypes, hybrid F1 breeding stock (Experimental) and inbred LCV (Local check variety)
NA-Not available due to noninclusion or trial not executed					USED FOR GENETIC GAIN
YEAR	TRIAL	LOCATIONS	HYBRID F1 GENOTYPES (NO.)	YEARS TESTED (No.)	TOP-1HYBRID GENOTYPE (kg/ha)	TOP-2 HYBRID GENOTYPE (kg/ha)	TOP-3 HYBRID GENOTYPE (kg/ha)	TOP-3 HYBRID GENOTYPES MEAN (kg/ha)	EXPERIMENTAL MEAN (kg/ha)	INBRED LOCAL CHECK (LCV) MEAN (kg/ha)
1988	IHRT-E (≤ 120 days)	NO TRIAL	NA	NA	NA	NA	NA	NA	NA	NA
1989	IHRT-E (≤ 120 days)	NO TRIAL	NA	NA	NA	NA	NA	NA	NA	NA
1990	IHRT-E (≤ 120 days)	NO TRIAL	NA	NA	NA	NA	NA	NA	NA	NA
1991	IHRT-E (≤ 120 days)	10	18	1	6017	5790	5484	5764	5436	5190
1992	IHRT-E (≤ 120 days)			NA	NA	NA	NA	NA	NA	NA
1993	IHRT-E (≤ 120 days)	6	22	2	5556	5418	5405	5460	4684	4657
1994	IHRT-E (≤ 120 days)	12	17	3	6108	6088	5888	6028	5394	5043
1995	IHRT-E (≤ 120 days)	6	20	4	7039	6953	6589	6860	5261	4753
1996	IHRT-E (≤ 120 days)	NO TRIAL	NA	NA	NA	NA	NA	NA	NA	NA
1997	IHRT-E (≤ 120 days)	13	34	5	7414	7370	7355	7380	6392	6113
1998	IHRT-E (≤ 120 days)	18	33	6	6505	6407	6324	6412	5596	5100
1999	IHRT-E (≤ 120 days)	NO TRIAL	NA	NA	NA	NA	NA	NA	NA	NA
2000	IHRT-E (≤ 120 days)	46	8	7	5589	5339	5295	5408	5273	4763
2001	IHRT-E (≤ 120 days)	25	10	8	6442	6427	6053	6307	5669	4965
2002	IHRT-E (≤ 120 days)	24	11	9	6381	6364	6104	6283	5712	5428
2003	IHRT-E (≤ 120 days)	26	13	10	6175	6086	6014	6092	5310	5090
2004	IHRT-E (≤ 120 days)	27	19	11	6934	6626	6564	6708	5914	5291
2005	IHRT-E (≤ 120 days)	28	15	12	6134	5411	5320	5622	5201	5048
2006	IHRT-E (≤ 120 days)	29	10	13	5928	5804	5757	5830	4753	4655
2007	IHRT-E (≤ 120 days)	26	14	14	6160	6085	5971	6072	5309	5054
2008	IHRT-E (≤ 120 days)	29	7	15	5497	5320	5318	5378	4846	4523
2009	IHRT-E (≤ 120 days)	32	8	16	6083	5963	5951	5999	5367	4969
2010	IHRT-E (≤ 120 days)	29	9	17	5872	5563	5515	5650	5028	4581
2011	IHRT-E (≤ 120 days)	32	20	18	5892	5880	5662	5811	4918	4702
2012	IHRT-E (≤ 120 days)	31	21	19	6233	6192	6161	6195	5376	5132
2013	IHRT-E (≤ 120 days)	31	21	20	5975	5967	5906	5949	5238	4793
2014	IHRT-E (≤ 120 days)	34	25	21	6538	6433	6407	6459	5732	5489
2015	IHRT-E (≤ 120 days)	34	28	22	6147	6118	5949	6071	5390	4944
2016	IHRT-E (≤ 120 days)	28	29	23	6540	6490	6300	6443	5430	5694
2017	IHRT-E (≤ 120 days)	23	21	24	7076	7024	6607	6902	6092	5901
2018	IHRT-E (≤ 120 days)	31	18	25	7350	7324	7311	7328	6402	6278
2019	IHRT-E (≤ 120 days)	31	15	26	7223	6705	6567	6831.67	5988	5217.33
1988	IHRT-ME (121-130 days)	NO TRIAL	NA	NA	NA	NA	NA	NA	NA	NA
1989	IHRT-ME (121-130 days)	NO TRIAL	NA	NA	NA	NA	NA	NA	NA	NA
1990	IHRT-ME (121-130 days)	NO TRIAL	NA	NA	NA	NA	NA	NA	NA	NA
1991	IHRT-ME (121-130 days)	10	22	1	5785	5517	5513	5605	NA	5162
1992	IHRT-ME (121-130 days)	5	21	2	7547	7159	7190	7299	NA	6824
1993	IHRT-ME (121-130 days)	12	22	3	5592	5340	5296	5409	4690	4540
1994	IHRT-ME (121-130 days)	12	21	4	6566	6513	6103	6394	5423	4716
1995	IHRT-ME (121-130 days)	8	22	5	7075	6912	6760	6916	5776	5563
1996	IHRT-ME (121-130 days)	8	32	6	6448	6427	6271	6382	5231	4437
1997	IHRT-ME (121-130 days)	12	28	7	6559	6448	6238	6415	5164	5251
1998	IHRT-ME (121-130 days)	18	30	8	6421	6367	6362	6383	5319	4852
1999	IHRT-ME (121-130 days)	22	13	9	7085	6807	6779	6890	5906	6273
2000	IHRT-ME (121-130 days)	21	15	10	6491	6395	6392	6426	5774	5159
2001	IHRT-ME (121-130 days)	25	16	11	6379	6273	6270	6307	5660	5347
2002	IHRT-ME (121-130 days)	24	21	12	6916	6863	6848	6876	6131	5999
2003	IHRT-ME (121-130 days)	25	21	13	6601	6527	6475	6534	5758	5489
2004	IHRT-ME (121-130 days)	28	24	14	7183	7002	6954	7046	6142	5985
2005	IHRT-ME (121-130 days)	27	24	15	6708	6694	6615	6672	5705	5726
2006	IHRT-ME (121-130 days)	25	10	16	6323	6241	6209	6258	5588	5421
2007	IHRT-ME (121-130 days)	24	21	17	7085	6977	6957	7006	5943	5795
2008	IHRT-ME (121-130 days)	29	19	18	6293	6244	6238	6258	5672	5299
2009	IHRT-ME (121-130 days)	32	20	19	6890	6560	6311	6587	5749	5388
2010	IHRT-ME (121-130 days)	30	27	20	5885	5846	5826	5852	5356	5137
2011	IHRT-ME (121-130 days)	32	38	21	6478	6400	6360	6413	5712	5608
2012	IHRT-ME (121-130 days)	31	26	22	6415	6407	6349	6390	6021	5779
2013	IHRT-ME (121-130 days)	32	33	23	6469	6400	6326	6398	5869	5493
2014	IHRT-ME (121-130 days)	34	45	24	6988	6943	6835	6922	5851	5807
2015	IHRT-ME (121-130 days)	35	45	25	6225	6039	5890	6051	5460	5229
2016	IHRT-ME (121-130 days)	25	33	26	6810	6570	6369	6583	5843	5545
2017	IHRT-ME (121-130 days)	20	33	27	6659	6581	6562	6601	5979	6042
2018	IHRT-ME (121-130 days)	31	30	28	7308	7241	7071	7207	6513	6685
2019	IHRT-ME (121-130 days)	34	27	29	7077	6863	6827	6922.33	6259	6031.33
1988	IHRT-MED (131-140 days)	6	8	1	6244	5802	5787	5944	5199	5795
1989	IHRT-MED (131-140 days)	10	12	2	5590	4759	4565	4971	3991	4773
1990	IHRT-MED (131-140 days)	NO TRIAL	NA	NA	NA	NA	NA	NA	NA	NA
1991	IHRT-MED (131-140 days)	16	36	3	5441	4523	4275	4746	4298	3704
1992	IHRT-MED (131-140 days)	NO TRIAL	NA	NA	NA	NA	NA	NA	NA	NA
1993	IHRT-MED (131-140 days)	5	16	4	6237	5885	5613	5912	5182	4970
1994	IHRT-MED (131-140 days)	11	21	5	6469	6436	6218	6374	5565	5173
1995	IHRT-MED (131-140 days)	7	22	6	6410	6269	6092	6257	5318	4836
1996	IHRT-MED (131-140 days)	8	23	7	6859	6836	6740	6812	6158	5997
1997	IHRT-MED (131-140 days)	8	28	8	5270	5035	4996	5100	4206	4339
1998	IHRT-MED (131-140 days)	10	32	9	5938	5622	5590	5717	4952	4887
1999	IHRT-MED (131-140 days)	33	17	10	6874	6697	6457	6676	5867	6109
2000	IHRT-MED (131-140 days)	21	15	11	6125	6088	6028	6080	5365	5512
2001	IHRT-MED (131-140 days)	25	16	12	6751	6544	6534	6610	6021	5586
2002	IHRT-MED (131-140 days)	25	23	13	6883	6877	6788	6849	5961	5990
2003	IHRT-MED (131-140 days)	26	21	14	6625	6525	6465	6538	5813	5940
2004	IHRT-MED (131-140 days)	26	30	15	6900	6860	6848	6869	5060	5704
2005	IHRT-MED (131-140 days)	26	21	16	6446	6367	6356	6390	5685	5388
2006	IHRT-MED (131-140 days)	27	19	17	6531	6216	6055	6267	5679	5234
2007	IHRT-MED (131-140 days)	25	21	18	6527	6524	6496	6516	5833	5527
2008	IHRT-MED (131-140 days)	27	18	19	6518	6373	6263	6385	5351	5570
2009	IHRT-MED (131-140 days)	27	23	20	6467	6376	6291	6378	5646	5263
2010	IHRT-MED (131-140 days)	28	19	21	5968	5906	5835	5903	5453	5200
2011	IHRT-MED (131-140 days)	32	23	22	6095	6069	6045	6070	5575	5500
2012	IHRT-MED (131-140 days)	34	24	23	6539	6409	6365	6438	5822	5619
2013	IHRT-MED (131-140 days)	37	31	24	6140	6135	6134	6136	5599	5326
2014	IHRT-MED (131-140 days)	35	32	25	6428	6080	5998	6169	5541	5223
2015	IHRT-MED (131-140 days)	35	13	26	6039	5900	5848	5929	5460	5487
2016	IHRT-MED (131-140 days)	30	23	27	6369	6118	6073	6187	5583	5356
2017	IHRT-MED (131-140 days)	24	26	28	7065	6956	6823	6948	6121	6023
2018	IHRT-MED (131-140 days)	30	18	29	7182	7089	7046	7106	6377	5836
2019	IHRT-MED (131-140 days)	35	24	30	7562	7265	7185	7337.33	6635	6141
1988	IHRT-MS (130±5 days)	NO TRIAL
1989	IHRT-MS (130±5 days)	NO TRIAL
1990	IHRT-MS (130±5 days)	NO TRIAL
1991	IHRT-MS (130±5 days)	NO TRIAL
1992	IHRT-MS (130±5 days)	NO TRIAL
1993	IHRT-MS (130±5 days)	NO TRIAL
1994	IHRT-MS (130±5 days)	NO TRIAL
1995	IHRT-MS (130±5 days)	NO TRIAL
1996	IHRT-MS (130±5 days)	NO TRIAL
1997	IHRT-MS (130±5 days)	NO TRIAL
1998	IHRT-MS (130±5 days)	NO TRIAL
1999	IHRT-MS (130±5 days)	NO TRIAL
2000	IHRT-MS (130±5 days)	NO TRIAL
2001	IHRT-MS (130±5 days)	NO TRIAL
2002	IHRT-MS (130±5 days)	NO TRIAL
2003	IHRT-MS (130±5 days)	NO TRIAL
2004	IHRT-MS (130±5 days)	NO TRIAL
2005	IHRT-MS (130±5 days)	NO TRIAL
2006	IHRT-MS (130±5 days)	31	11	1	6562	6542	6538	6547	5939	5708
2007	IHRT-MS (130±5 days)	18	15	2	6515	6111	5986	6204	5595	5599
2008	IHRT-MS (130±5 days)	28	29	3	6485	6368	6335	6396	5595	5154
2009	IHRT-MS (130±5 days)	33	18	4	6101	6026	6009	6045	5470	4930
2010	IHRT-MS (130±5 days)	25	16	5	6396	6338	6203	6312	5700	5083
2011	IHRT-MS (130±5 days)	23	17	6	5597	5458	5422	5492	4881	4657
2012	IHRT-MS (130±5 days)	26	18	7	6366	6249	6141	6252	5653	5353
2013	IHRT-MS (130±5 days)	27	16	8	5627	5570	5533	5577	5175	4907
2014	IHRT-MS (130±5 days)	24	16	9	6285	5919	5854	6019	5619	5285
2015	IHRT-MS (130±5 days)	26	12	10	6296	6275	6131	6234	5692	5099
2016	IHRT-MS (130±5 days)	23	13	11	5859	5605	5580	5681	5035	4384
2017	IHRT-MS (130±5 days)	24	10	12	6051	5820	5771	5881	5186	4648
2018	IHRT-MS (130±5 days)	21	8	13	5587	5539	5470	5532	5191	4608
2019	IHRT-MS (130±5 days)	26	11	14	6419	6299	6204	6307.33	5615	5493.33

## Sheet: Sheet2
	SHEET 2. Particulars of trials executed at different locations with hybrid (F1) genotypes along with inbred local variety checks in different maturity groups in the all-India co-ordinated rice improvement experiments performed between 1988 and 2018*
	YEAR1,2,3 … No of years an experiment was executed								CHECK VARIETIES
	A = Public funded (ICAR-IIRR AICRIP centres)								LCV = INBRED LOCAL CHECK VARIETIES
	P = Private funded (seed business enterprices)								HYC = HYBRID CHECK VARIETY
	V = Voluntary centres (Local University or Krishi Vigyan Khendra (KVK) funded								BLANK CELL = NO EXPERIMENT OR NOT AVAILABLE
	GEOGRAPHICAL- Location arranged zig-zig geographically contiguousness
S. No.	TRIAL	TYPE-FUND	GEOGRAPHICAL	LOCATION	YEAR 1	YEAR 2	YEAR 3	YEAR 4	YEAR 5	YEAR 6	YEAR 7	YEAR 8	YEAR 9	YEAR 10	YEAR 11	YEAR 12	YEAR 13	YEAR 14	YEAR 15	YEAR 16	YEAR 17	YEAR 18	YEAR 19	YEAR 20	YEAR 21	YEAR 22	YEAR 23	YEAR 24
1	IHRT-E (≤ 120 days)	C	G104	Inbred local check variety (LCV)	6581	5478	5015	5362	5382	5296	5526	5411	4643	5155	4724	4999	4863	4778	4888	4845	5486	5028	5160	5336	5198	5198	5198	5217.33
2	IHRT-E (≤ 120 days)	A	G023	Karjat	3952	4600.26	4149	4273	3507	5667	4279.33	4586	4359	6018	3334	5303.5	4861	4932	5172	3900	4753	4658	4672	4665	4593	5839	6504	5988
3	IHRT-E (≤ 120 days)	A	G011	Maruteru	4847	1206.24	2835	2200	5259	2587	3488.87	4786	4770	3254	5410	4659	5942	3901	4335	2982	4024	3637	3868	3536	4291	5474	5058	4350
4	IHRT-E (≤ 120 days)	A	G015	Hyderabad	4134	4139	3855		4746	4621	5283	5751	4834	4534	3922	4277.5	4273	3260	5310	3178	2603	6050	5879.65	5543	3847	5037	6313	5113
5	IHRT-E (≤ 120 days)	A	G006	Mandya	6520	8810	6064	5847	6965	7874	6672.67	6011	7900	6042	5321	7853.5	7433	9700	6866	8309	5137	6778	8593	6285	6201		8885	9335
6	IHRT-E (≤ 120 days)	A	G040	Chinsurah	4051	5306.5	4888	4931	2299	4860	4361.93	4512	3760	4452	4543		4027	3506	3909	4042	7401	6056	6529	5418	5260		5793	6664
7	IHRT-E (≤ 120 days)	A	G002	Coimbatore	7460	6562	7406	6504	5478	5794	6920.8	2660	9466	6342	6635	6861.5		6542	6317	7032	8239	6357	6821	6367	7999		6848	7215
8	IHRT-E (≤ 120 days)	A	G053	Pantnagar	3544	5801.58	3788	4120	3822	6077		4814	6195	5112	4101	4704.5	4084	3275	3774	3383	3448	2906	3102	3103	4194		4854	6248
9	IHRT-E (≤ 120 days)	A	G030	Raipur		2844.28	2755	3386	5169	4791	4514.93	4138	4969	6071	5118	3730.5	4598	7280		4933	4315	4389	4653	3938	4917	5810	5702	7543
10	IHRT-E (≤ 120 days)	A	G025	Nawagam			5513			8067	7006.64	4690	6915	6219	4658	4962	4978	7297	3130	4610	3684	5967	5558	5254		5617	5931
11	IHRT-E (≤ 120 days)	A	G001	Aduthurai								3835	6900	4934	4978	6460	6587	6599	4711	4231	7178	6542	3826	3495	5265	6428	6466	6369
12	IHRT-E (≤ 120 days)	A	G031	Bhubaneshwar		2486.43	3199	3092	2601	3244	3355.33	3053	3828	2916	3485	2893.5	3065	3011	2571		4144	3984		3452
13	IHRT-E (≤ 120 days)	C	G103	Hybrid check variety (HCV)	5963	4830	5892	6129	5975	6207	6364	5462	5729	5320	4983	5971	5243	5803	5900	6518								6108
14	IHRT-E (≤ 120 days)	V	G029	Jabalpur								4039	7109	6746	7066	7321	5625	6301		4439	6385	6021	4741	7831	4895	6624	5820	6835
15	IHRT-E (≤ 120 days)	A	G060	Ludhiana									6810	7250	6524	5711	5334	6596	8177	3262	8712	7176	6831	7465	6179	6407	6799	6551
16	IHRT-E (≤ 120 days)	P	G067	Advanta			8137	6726	3454	5607	7592.6						6468	8562		8129	6849	5718	6522	9956	7034	6236	8685
17	IHRT-E (≤ 120 days)	A	G062	Malan									3128	4884		3532	3618	2561	3122	4532	3963	4040	4429	3608	6510	7710	6598	6279
18	IHRT-E (≤ 120 days)	A	G046	Titabar								2733	1875	3163	3591	4240	3239	4463	3652	3685	3482	3947		4978	4106		4986	4854
19	IHRT-E (≤ 120 days)	A	G012	Warangal										4782	5809	7569	5403	6614	3652	7075	6617	4583	4952	5000	4453	5013	7106	6043
20	IHRT-E (≤ 120 days)	A	G058	Karnal	6589	6550.91	7584	7241	6386	8547	8200.92	6657	8390	6111	4915	7096.5	5918					8185
21	IHRT-E (≤ 120 days)	P	G094	Mahyco Seeds		8579.94	5702		5491	7854	7731.13	10044	5988.5			9556.5		7136	7678	8140		6245	7963	5586
22	IHRT-E (≤ 120 days)	P	G086	Bayer												5510.5		6814	7681	6216	10441	5803	6366	6438	6800	7953	8130	5700
23	IHRT-E (≤ 120 days)	V	G049	Allahabad										2308	4612	5326	4603	4719	4441	4607			4597	4577	5683		6248
24	IHRT-E (≤ 120 days)	V	G027	Dabhoi												5332	3993	4525	4149	3925	4889	3165	4828	6253	3755		6135
25	IHRT-E (≤ 120 days)	A	G051	Faizabad	4294	4602.79	3744	4289	3689	3969	5029.73	4046		4105	3509	4626.5
26	IHRT-E (≤ 120 days)	A	G052	Masoda													2631	4939		4980	5177	4480	4585	4192	5398	5566	4628	4345
27	IHRT-E (≤ 120 days)	P	G084	VNR Seeds													8013	9696	4428	3726	7118	5597	5801.21		5510	7803	7417	5950
28	IHRT-E (≤ 120 days)	A	G032	Chiplima							3539.64		2742	3445	2507	2270		5200	4292	3498	3623	3980
29	IHRT-E (≤ 120 days)	A	G036	Ranchi											3685	4478.5	6317	2993	3040		3810	4179		1248	5929	5885
30	IHRT-E (≤ 120 days)	V	G017	Vadgaon															4388	4855	5139	6107	5968	5283	4792	5002	5896	6133
31	IHRT-E (≤ 120 days)	P	G085	HR International		8209.55	6710	7384	6109	6350		7116	7045	4422	6407
32	IHRT-E (≤ 120 days)	V	G003	Karaikal								4226	5471	6037	4335	5486	4989	4782	6958	5099
33	IHRT-E (≤ 120 days)	A	G059	Kaul														6591		7598	7616		8184.67	5925	6849	7068	6270	5473
34	IHRT-E (≤ 120 days)	A	G044	Arundhatinagar						4473	4096.5	4036	4598	4158	4353	5061												4728
35	IHRT-E (≤ 120 days)	A	G026	Navasari																5195	4005	3940	6450	6140	7110		6044	4307
36	IHRT-E (≤ 120 days)	A	G035	Sakoli																2299	2942	2485	4519	5182		5348	6500	5806
37	IHRT-E (≤ 120 days)	V	G018	Sindewahi											3808	5206	3314	3951			3425	1839	5716	2956
38	IHRT-E (≤ 120 days)	P	G074	Syngenta India						7061	7511.73	6583	8875	8018	6148											5720		7004
39	IHRT-E (≤ 120 days)	P	G076	Ankur Seeds																		4052	5478	4074	4748	5014	5056	5506
40	IHRT-E (≤ 120 days)	P	G087	Bio Seeds						10675		6679	8548										5074	6722	5576	7302
41	IHRT-E (≤ 120 days)	A	G009	Bramhavar													3905	3943					3231	3027	3720		4519	4263
42	IHRT-E (≤ 120 days)	V	G016	Gaddipally		8098.59	4857	7554	5273	5751	6983.6
43	IHRT-E (≤ 120 days)	A	G061	Kapurthala		5015.71		3751	5941	5829	7685.36
44	IHRT-E (≤ 120 days)	P	G083	Parry Monsanto					7366	5590.5	7250.4	7926	7113
45	IHRT-E (≤ 120 days)	P	G065	Hindustan Lever		5782.07	5684	6388	6415
46	IHRT-E (≤ 120 days)	P	G091	JK Seeds															7457		6328			4266		6329
47	IHRT-E (≤ 120 days)	A	G005	Mugad													4764	7772	5194								7514
48	IHRT-E (≤ 120 days)	P	G095	Nuziveedu Seeds															7776				7864				9172	8286
49	IHRT-E (≤ 120 days)	A	G047	Patna							4650.29						2957	3905		2979
50	IHRT-E (≤ 120 days)	A	G063	Chatta												4374	2697		5169
51	IHRT-E (≤ 120 days)	P	G088	Ganga Kaveri Seeds								6370											8194		6820
52	IHRT-E (≤ 120 days)	P	G069	Indo American Hybrids				6159	6784		6892.43
53	IHRT-E (≤ 120 days)	V	G055	Jodhpur					2927	3110	3375.33
54	IHRT-E (≤ 120 days)	P	G070	Trimurthy Plant Sciences																						6304	6242	4540
55	IHRT-E (≤ 120 days)	A	G042	Wangbal																2825	4897	5036
56	IHRT-E (≤ 120 days)	P	G072	EID Parrys			8632	4818
57	IHRT-E (≤ 120 days)	P	G098	Emergent Genetics								6909	8209
58	IHRT-E (≤ 120 days)	A	G037	Hazaribag																			1406	7544
59	IHRT-E (≤ 120 days)	P	G075	Nath Seeds								8130		7002
60	IHRT-E (≤ 120 days)	P	G093	Nathbiogene									5283			7627
61	IHRT-E (≤ 120 days)	P	G071	Savannah Seeds																	6322			9823
62	IHRT-E (≤ 120 days)	A	G050	Varanasi															4818	5218
63	IHRT-E (≤ 120 days)	V	G024	Vyra											4975				4125
64	IHRT-E (≤ 120 days)	V	G056	Banswara						3962
65	IHRT-E (≤ 120 days)	P	G102	Bisco																						7302
66	IHRT-E (≤ 120 days)	V	G038	Dumka											4835
67	IHRT-E (≤ 120 days)	A	G045	Gerua						5074
68	IHRT-E (≤ 120 days)	V	G081	Gujarat State Fertilizer Corporation				6827
69	IHRT-E (≤ 120 days)	V	G043	Imphal								5665
70	IHRT-E (≤ 120 days)	P	G066	Namdhari Seeds										5775
71	IHRT-E (≤ 120 days)	P	G101	Nirmal Seeds					5265
72	IHRT-E (≤ 120 days)	P	G097	Novartis				3545
73	IHRT-E (≤ 120 days)	V	G022	Palghar							4294.2
74	IHRT-E (≤ 120 days)	P	G082	Paras							6439
75	IHRT-E (≤ 120 days)	V	G021	Pondaghat																					4999
76	IHRT-E (≤ 120 days)	P	G077	Prabhatagri Biotech									5512
77	IHRT-E (≤ 120 days)	P	G078	Pradham Biotech										8508
78	IHRT-E (≤ 120 days)	V	G039	Raghunathpur										4451
79	IHRT-E (≤ 120 days)	A	G013	Rajendranagar				6191
80	IHRT-E (≤ 120 days)	P	G092	Tierra Seeds																							6377
81	IHRT-E (≤ 120 days)	P	G073	Zuari Seeds																8494
82	IHRT-E (≤ 120 days)	V	G057	New Delhi																								7354
83	IHRT-E (≤ 120 days)	V	G054	Nagina																								5869
84	IHRT-E (≤ 120 days)	V	G020	Radhanagari																								4779
85	IHRT-ME (121-130 days)	A	G011	Maruteru	1237.63	1729	3963	2967	4889.4	4244	4367	4196	6326	6360	3592	5399	3584	3435	3990	4973	5063	5028						4941
86	IHRT-ME (121-130 days)	C	G104	Inbred local check variety (LCV)	5205	5727	5315	5897	5466	5796	5685	5735	5501	5335	5795	4813	5466	6057	6121	5428	6032	6290						6031.33
87	IHRT-ME (121-130 days)	A	G023	Karjat	4243.47	3675	3891	6888	4550.76	4648	4432	7139	4271	5440	5221	5583	5182	4749	5144	5063	5989	6658						6099
88	IHRT-ME (121-130 days)	A	G002	Coimbatore	6506.47	5546	9173	6405	7741.96	4490	9134	7871	7506	8219	7499	6197	9244	7510	6823	7302	5486	6611						6586
89	IHRT-ME (121-130 days)	C	G103	Hybrid check variety (HCV)	6143	5904	6376	5868	5578	5310	5785	5741	5648	6863	6013	6500	5989	6272	5616	6195	6221							6404
90	IHRT-ME (121-130 days)	A	G040	Chinsurah	4914.8	4579	2732	4490	5083.8	5112	4706	4575	5534	4424	4230	5149	4263	6072	7508	6356		5463						6990
91	IHRT-ME (121-130 days)	A	G006	Mandya	7908.1	6628	6657	7841	6349.79	6824	8725	6876	7083	7749	8656	6862	8642	5234	8379	9451		9847						9555
92	IHRT-ME (121-130 days)	A	G015	Hyderabad	3737.27	3938		4729	5283.12	6391	5107	4243	4357	4260	4136	5616	2815	5066	5979	4294	5026	6951
93	IHRT-ME (121-130 days)	A	G025	Nawagam		2822		7349	6752.58	4722	8492	5268	6545	5763	7549	3285	5025	6075	5858		4975	6666						4360
94	IHRT-ME (121-130 days)	A	G030	Raipur	4009.55	2497	5890	5535	4858.28	4557	5326	5044	5202	5337		5419	5637	5699	4029	4607								6254
95	IHRT-ME (121-130 days)	A	G053	Pantnagar	5304.5	3820	4288	6014		4913	5925	5183	4908	3651		4080	3726	1803	3362	5259								6041
96	IHRT-ME (121-130 days)	P	G094	Mahyco Seeds	5751.45	6003	4507	7434	6303.46	9745	5981	7713		9731	7534	8989	8049	6079	8618
97	IHRT-ME (121-130 days)	A	G032	Chiplima					3802.48		3079	4571	3019		4989	5426	4285	4124	6158	7270	5865	5086						5656
98	IHRT-ME (121-130 days)	V	G029	Jabalpur						5522	3639	5661	7410	5606		6794	5536	7473	7454	5572	7131	6037						6818
99	IHRT-ME (121-130 days)	A	G060	Ludhiana							9078	6984	7461	5498		6678	4283	6502	7212	8131	7566	6778						6365
100	IHRT-ME (121-130 days)	A	G031	Bhubaneshwar	2526.73	3348	3021	3279	3445.33	3316	3354	2692	5800	3373		2318		3730
101	IHRT-ME (121-130 days)	A	G058	Karnal	6260.33	7257	7431	8710	9201.95	7162	7887	6760	5757	6848				7768
102	IHRT-ME (121-130 days)	A	G046	Titabar						3892	2770	3934	4172	3935		4058	4278	5160	4459	4593		5347
103	IHRT-ME (121-130 days)	A	G012	Warangal								7687	7671	2159	6716	4058	8394	4349	6012	5094	4889	5943
104	IHRT-ME (121-130 days)	V	G018	Sindewahi									4524	5510	6108	3723	3845	1776	3495	4569		4991						5615
105	IHRT-ME (121-130 days)	P	G086	Bayer										9031	6450	7362	7888	6990	6193	7565	7995	8527						6234
106	IHRT-ME (121-130 days)	A	G052	Masoda										4906	4650	5706	3744	5590	5419	5585		5807						5106
107	IHRT-ME (121-130 days)	V	G049	Allahabad								3770	4035	4509	5849	4178	5379		4886	5150								6460
108	IHRT-ME (121-130 days)	P	G074	Syngenta India				6727	8560.6	6572	9331	8285	7839								5416	7707						7280
109	IHRT-ME (121-130 days)	P	G067	Advanta		7067		4414						7437				6203	5617	7044	6217	8503						7853
110	IHRT-ME (121-130 days)	P	G085	HR International	6476.72	6249	6279	6777		7435	6953	6438	7114						6192
111	IHRT-ME (121-130 days)	A	G001	Aduthurai						6566	5288			6804	6699	5657	4052					7018						6857
112	IHRT-ME (121-130 days)	V	G027	Dabhoi										4258	5520	5161	4240	6256	4705	5563		5301
113	IHRT-ME (121-130 days)	A	G051	Faizabad	3861.7	2980	4965	4469	5979.16	4277		4301	4613
114	IHRT-ME (121-130 days)	V	G003	Karaikal						4729	5218	5766	4335	5901	4104	7066	4979
115	IHRT-ME (121-130 days)	P	G084	VNR Seeds										7568		4672	4270	3164	4267.8	6856	8025	7681
116	IHRT-ME (121-130 days)	A	G044	Arundhatinagar				4014	4444.21	4767	5464	4875	3946															5329
117	IHRT-ME (121-130 days)	A	G026	Navasari													4242	3609	6242	5247	4922	5288						5687
118	IHRT-ME (121-130 days)	A	G059	Kaul												4498	9083		8569	6568	5907	7031						6839
119	IHRT-ME (121-130 days)	A	G063	Chatta												5387	4528			5177	6401	6835						5219
120	IHRT-ME (121-130 days)	P	G076	Ankur Seeds														4579	5147	5094	5134	5285						6455
121	IHRT-ME (121-130 days)	P	G095	Nuziveedu Seeds										5124	6398		7932	7770	10233			10172
122	IHRT-ME (121-130 days)	A	G005	Mugad													5656	8775	5517			6503						6142
123	IHRT-ME (121-130 days)	P	G087	Bio Seeds				6851			6042								5014		7029	6942
124	IHRT-ME (121-130 days)	V	G016	Gaddipally	5464.33	4036	7589	5499	7657.88
125	IHRT-ME (121-130 days)	P	G090	Kaveri Seeds										7337	5976	4465	7918	7141
126	IHRT-ME (121-130 days)	P	G083	Parry Monsanto			6876	5247.5	8055.33	8190	6898
127	IHRT-ME (121-130 days)	P	G091	JK Seeds													5906	8655			6680							5095
128	IHRT-ME (121-130 days)	A	G061	Kapurthala	1625.53		6945	6351	8155.45
129	IHRT-ME (121-130 days)	A	G036	Ranchi									5368	4722				3573	3639
130	IHRT-ME (121-130 days)	V	G048	Pusa										3096								4652						4305
131	IHRT-ME (121-130 days)	V	G043	Imphal						5684	6569																	5464
132	IHRT-ME (121-130 days)	P	G099	Dantiwadi Seeds													8281	3785	5055
133	IHRT-ME (121-130 days)	P	G088	Ganga Kaveri Seeds						7724								6644	8883
134	IHRT-ME (121-130 days)	V	G055	Jodhpur			2215	5955	5098.42
135	IHRT-ME (121-130 days)	V	G024	Vyra			5553						5050			3513
136	IHRT-ME (121-130 days)	V	G020	Radhanagari																		5348						4984
137	IHRT-ME (121-130 days)	P	G092	Tierra Seeds																		7287						9021
138	IHRT-ME (121-130 days)	P	G102	Bisco																						7029	6942
139	IHRT-ME (121-130 days)	P	G098	Emergent Genetics						6347	7748
140	IHRT-ME (121-130 days)	P	G065	Hindustan Lever		5771	7122
141	IHRT-ME (121-130 days)	P	G069	Indo American Hybrids			7348		7711.58
142	IHRT-ME (121-130 days)	P	G075	Nath Seeds					5380.62	7373
143	IHRT-ME (121-130 days)	P	G093	Nathbiogene							6917	7290
144	IHRT-ME (121-130 days)	P	G089	Vibhaagrotech							9337	8112
145	IHRT-ME (121-130 days)	P	G073	Zuari Seeds											9089	7227
146	IHRT-ME (121-130 days)	P	G080	Pioneer seeds																								7252
147	IHRT-ME (121-130 days)	V	G057	New Delhi																								7571
148	IHRT-ME (121-130 days)	V	G056	Banswara				4019
149	IHRT-ME (121-130 days)	A	G009	Bramhavar																3690
150	IHRT-ME (121-130 days)	V	G041	Chakdaha								3622
151	IHRT-ME (121-130 days)	P	G079	Dev Gen											8829
152	IHRT-ME (121-130 days)	P	G072	EID Parrys		7085
153	IHRT-ME (121-130 days)	A	G045	Gerua				5193
154	IHRT-ME (121-130 days)	V	G014	Jagatiyal															8703
155	IHRT-ME (121-130 days)	P	G100	Krishidhan Seeds													7974
156	IHRT-ME (121-130 days)	P	G066	Namdhari Seeds								7214
157	IHRT-ME (121-130 days)	A	G033	Cuttack																		4887
158	IHRT-ME (121-130 days)	V	G022	Palghar					4987.08
159	IHRT-ME (121-130 days)	P	G082	Paras					6579.29
160	IHRT-ME (121-130 days)	A	G047	Patna					5664.71
161	IHRT-ME (121-130 days)	P	G077	Prabhatagri Biotech							6391
162	IHRT-ME (121-130 days)	P	G078	Pradham Biotech								5375
163	IHRT-ME (121-130 days)	A	G013	Rajendranagar			4331
164	IHRT-ME (121-130 days)	P	G070	Trimurthy Plant Sciences															8981
165	IHRT-ME (121-130 days)	A	G050	Varanasi																	5898
166	IHRT-ME (121-130 days)	A	G042	Wangbal												6201
167	IHRT-MED (131-140 days)	A	G040	Chinsurah	5256	4233.86	4164	5504	4143	4854.37	4657	5053	5767	5140	4813	4200	5568	5492	4325	6363	5789	7149.27	5999	6298	5840	5804		7448
168	IHRT-MED (131-140 days)	A	G002	Coimbatore	7349	5867.7	6315	7019	6777	8078	4864	8960	4416	5301	7112	7864	7882	6515	9697	6791	8343	7762.93	7362	7113	5812	7130		6807
169	IHRT-MED (131-140 days)	C	G103	Hybrid check variety (HCV)	6039	6663	6710	6465	6604	6298	5729	6041	6197	5807	5812	6242	5715	5762	6710	6465	6604	6298	5729	6041	6197	5807		7161
170	IHRT-MED (131-140 days)	C	G104	Inbred local check variety (LCV)	6800	5041	5779	5742	6023	5849	5579	5741	5392	5771	5701	5444	5598	5465	5707	5501	5711	5290	5081	5745	5580	5580		6141
171	IHRT-MED (131-140 days)	A	G023	Karjat	4725	2661.58	3693	3431	6864	3800	4730	5767	7146	5943	4929	4813	485	5304	4748	5004	4645	4801.07	6125	5377	5723	6299		5880
172	IHRT-MED (131-140 days)	A	G011	Maruteru	5836	2123.33	2160	2928	4034	4203	3085	4299	4115	5065	5513	5323	3961	5410	4041	5011	3779	4571.01	3444	4994	4973	5258		5034
173	IHRT-MED (131-140 days)	A	G015	Hyderabad	4902	3988.93	4336		5785	5188	6401	5180	4526	4233	4085	5692	4129	4938	3388	3001	5769	5827.11	4851	4556	5074	6321		5328
174	IHRT-MED (131-140 days)	A	G006	Mandya	7736	7374.28	6120	5587	7773	5487	5596	7921	6856	5698	6862	5363	7755	7914	7489	5529	7100	8065.17	5534	8315		11061		9710
175	IHRT-MED (131-140 days)	A	G053	Pantnagar	4000	3724.07	1517	5715	6905		4762	6091	6126	6708	5808	4551	3912	4492	4073	3863	2397	2866.32	4066	5365	5051			6252
176	IHRT-MED (131-140 days)	A	G030	Raipur				3972	6045	5806.04	4756	6113	6634	4969	3708	3676	4895	5935	6051	5948	5322	4527.19	4165	5009				6780
177	IHRT-MED (131-140 days)	A	G046	Titabar						4555	4258	3320	4119	4401	4516	4576	4712	4300	4739	3979	4368	4580.87	4674	5178	5154	5213		5817
178	IHRT-MED (131-140 days)	V	G029	Jabalpur							4772	3741	6133	7199	7358	6984	2042	7839	4278	5896	7051	7699.27	8110	6974		6437		6846
179	IHRT-MED (131-140 days)	A	G060	Ludhiana								7652	7646	7858	6954	3687	6572	5344	4983	7520	6158	6749.32	6209	6608	7961	5942		5241
180	IHRT-MED (131-140 days)	A	G025	Nawagam						7507	5469	6206	5910		5607	4315	3754	3473	5538	3106	5245	6123.13	4447	3512		4990		6227
181	IHRT-MED (131-140 days)	A	G031	Bhubaneshwar			3126	2006	3199	3554.07	3227	4078	3515	3894	3612	2791	2972	2976	3826	5133	3254
182	IHRT-MED (131-140 days)	A	G012	Warangal									9091	7206	8892	5849	6335	6631	8602	6077	4620	4525.54	3933	7510	5128	5917
183	IHRT-MED (131-140 days)	P	G086	Bayer											7421	7976	8064	7436	8552	8606	7542	5493.29	8446	7513	8415	7425		6884
184	IHRT-MED (131-140 days)	V	G018	Sindewahi										3970	5133	6260	5009	4558	3063	4282	3110	3883.08	3520	3539		4787		5184
185	IHRT-MED (131-140 days)	V	G049	Allahabad									3687	6552	7514	6648	8210	5215	5270		5085	4832.32	4844	5266	5979
186	IHRT-MED (131-140 days)	A	G032	Chiplima						3740.59		3561	5106	2631	3398		5790	6536	4988	5011	5833	5930.78	5996
187	IHRT-MED (131-140 days)	V	G027	Dabhoi											5604	3013	5998	5535	4260	6032	4048	5674.84	5836	5635	5036			5790
188	IHRT-MED (131-140 days)	P	G094	Mahyco Seeds					8135	6771	7477	5752.5			9976	9408	7720	8143	8464		6289	7645.49	6859
189	IHRT-MED (131-140 days)	A	G052	Masoda												4315	5043	5574	5531	6054	5737	5607.64	6971	6348	5637	5410		5171
190	IHRT-MED (131-140 days)	P	G067	Advanta				6231	5118	7217	7325					7641				6633	5987	5980.6	9059		6585	8022
191	IHRT-MED (131-140 days)	A	G058	Karnal	7886		6900	7752	9243	8494.35		7172	6911	6632	7888	5615					7582
192	IHRT-MED (131-140 days)	A	G044	Arundhatinagar					4226	4421	5425	5916	5320	4650	4686								3603	4735				6382
193	IHRT-MED (131-140 days)	A	G051	Faizabad	5474	4033.5	2855	5004	4997	5800.19	4685		4940	5116	5876
194	IHRT-MED (131-140 days)	V	G004	Sirsi									4145	7075	4646	5787	3719	4660	5067	5867	4250	4211.58
195	IHRT-MED (131-140 days)	P	G084	VNR Seeds												6296	7403	5155	5141	6222	4927	3978.2		5179	8444	7345
196	IHRT-MED (131-140 days)	V	G003	Karaikal		5531.62					5577	5560	2936	4406			4926				6255	2995.5	4622
197	IHRT-MED (131-140 days)	A	G059	Kaul													7774	5390	8309	8988		8225	6199		6038	6605		8273
198	IHRT-MED (131-140 days)	A	G026	Navasari															3997	4470	3806	5000.61	4779	4280	5683	5658		5873
199	IHRT-MED (131-140 days)	A	G033	Cuttack										5721	4461				5056			5305.17	5188	5454	6718	5353		6408
200	IHRT-MED (131-140 days)	A	G036	Ranchi										5359	5003	4315				5491	5297	4855.26	1222	3492				4255
201	IHRT-MED (131-140 days)	P	G074	Syngenta India					6446	7065	5855	8245	6453	8455											5778	6845		7158
202	IHRT-MED (131-140 days)	P	G087	Bio Seeds					9767		6087	5426								5536		4608.55	7436		6396	6112
203	IHRT-MED (131-140 days)	A	G009	Bramhavar															3074	5906	6402	3757	2865	5016		4960
204	IHRT-MED (131-140 days)	P	G085	HR International				8021	7034		7741	7488	6248	8120								8852.45
205	IHRT-MED (131-140 days)	P	G095	Nuziveedu Seeds																7674	7626		7432	9785	7062	8067		8446
206	IHRT-MED (131-140 days)	A	G001	Aduthurai							5462	5478									2511	3996.85	3992
207	IHRT-MED (131-140 days)	P	G076	Ankur Seeds																			4692	5445	5242	5505		6285
208	IHRT-MED (131-140 days)	A	G063	Chatta															6190	5516	5451	4279.8	5129
209	IHRT-MED (131-140 days)	P	G090	Kaveri Seeds												5920		4081	7834	6486	6246
210	IHRT-MED (131-140 days)	P	G064	Pan Seeds															8353	7605	8026	5233.66	5504
211	IHRT-MED (131-140 days)	V	G019	Shirgaon																				4026	5236	5099		4998
212	IHRT-MED (131-140 days)	V	G016	Gaddipally				8717	6249	8211
213	IHRT-MED (131-140 days)	P	G069	Indo American Hybrids				5770	7667	5988
214	IHRT-MED (131-140 days)	P	G091	JK Seeds																	7175	8017.31	3641
215	IHRT-MED (131-140 days)	A	G061	Kapurthala				4146	7046	8308.08
216	IHRT-MED (131-140 days)	P	G083	Parry Monsanto					5295.5	6607	8528
217	IHRT-MED (131-140 days)	A	G047	Patna						6066.11						2537	4642
218	IHRT-MED (131-140 days)	V	G021	Pondaghat																				5011		6311		7104
219	IHRT-MED (131-140 days)	A	G035	Sakoli																3329	2310			4924
220	IHRT-MED (131-140 days)	V	G024	Vyra					4136					5151				3653
221	IHRT-MED (131-140 days)	P	G102	Bisco																						7943	6806
222	IHRT-MED (131-140 days)	P	G098	Emergent Genetics							6951	8461
223	IHRT-MED (131-140 days)	P	G088	Ganga Kaveri Seeds							8076										6197
224	IHRT-MED (131-140 days)	A	G045	Gerua				4891	6156
225	IHRT-MED (131-140 days)	V	G055	Jodhpur					4151	4756.81
226	IHRT-MED (131-140 days)	P	G075	Nath Seeds							8271				8531
227	IHRT-MED (131-140 days)	P	G093	Nathbiogene								6750	7074
228	IHRT-MED (131-140 days)	V	G048	Pusa																						4878		4888
229	IHRT-MED (131-140 days)	P	G092	Tierra Seeds																						6593		10608
230	IHRT-MED (131-140 days)	A	G050	Varanasi														5561	5189
231	IHRT-MED (131-140 days)	V	G056	Banswara					3975
232	IHRT-MED (131-140 days)	P	G072	EID Parrys				5274
233	IHRT-MED (131-140 days)	P	G065	Hindustan Lever				6622
234	IHRT-MED (131-140 days)	V	G043	Imphal															4339
235	IHRT-MED (131-140 days)	V	G007	Malagi																				4897
236	IHRT-MED (131-140 days)	P	G066	Namdhari Seeds									7044
237	IHRT-MED (131-140 days)	P	G101	Nirmal Seeds																6958
238	IHRT-MED (131-140 days)	P	G097	Novartis				4234
239	IHRT-MED (131-140 days)	V	G022	Palghar						5418
240	IHRT-MED (131-140 days)	P	G082	Paras						6912
241	IHRT-MED (131-140 days)	P	G077	Prabhatagri Biotech								6066
242	IHRT-MED (131-140 days)	P	G078	Pradham Biotech									5495
243	IHRT-MED (131-140 days)	A	G013	Rajendranagar				6083
244	IHRT-MED (131-140 days)	P	G096	Sona Genetics								6258
245	IHRT-MED (131-140 days)	A	G042	Wangbal														4749
246	IHRT-MED (131-140 days)	V	G028	Waraseoni																						6466
247	IHRT-MED (131-140 days)	P	G073	Zuari Seeds																8051
248	IHRT-MED (131-140 days)	P	G080	Pioneer seeds																								7915
249	IHRT-MED (131-140 days)	A	G034	Sabour																								8081
250	IHRT-MS (130±5 days)	A	G015	Hyderabad	5026.33	3694	4307	3361	5485	2428	3061	4159	5263	3799	5234	5726	5472											5910
251	IHRT-MS (130±5 days)	CHECK	G104	Inbred local check variety (LCV)	5360	5365	4941	4434	4658	4997	4639	5089	5099	4384	4648	4608	5761											5493.33
252	IHRT-MS (130±5 days)	A	G023	Karjat	5168.22	5090	4863	4344	5289	4215	4104	4643	5926	6871	5836	5262	6264											5987
253	IHRT-MS (130±5 days)	A	G011	Maruteru	5235.89	4804	6246	4044	5604	3612	4472	3432	4063	4085	4744	4822	4914											5081
254	IHRT-MS (130±5 days)	A	G030	Raipur	4223.33	3327	2962	5094	4850	5249	3799	3733	5336	4199	5176	5975	4890											5800
255	IHRT-MS (130±5 days)	A	G012	Warangal	6982.56	8991	6288	6811	4444	6159	5471	4196	5205	5090	8711	5536	5224											5008
256	IHRT-MS (130±5 days)	A	G040	Chinsurah	5332.56	3854	4229	4346	5355	3742	5843	6112		5731	6057	5938	5789											6914
257	IHRT-MS (130±5 days)	A	G046	Titabar		4207	3864	4542	4444	4037	4402	3947	4134	5321	4416	4519	4506											5168
258	IHRT-MS (130±5 days)	A	G002	Coimbatore	6646.89	7281	7368	6746	5904	8069	7936	5848	6842		6770		6632											6669
259	IHRT-MS (130±5 days)	V	G029	Jabalpur	6460.89	6557	7005	8029		4496	8614	6406		7145	6585	5553	6059											5011
260	IHRT-MS (130±5 days)	A	G006	Mandya	5052.22	7717	5047	7372	7687	7720	6599	7216	9281		8443		10469											7982
261	IHRT-MS (130±5 days)	V	G018	Sindewahi	4998.22	4564	5930	3546	3638	3376	4596		3777	5314	4252		4983											4941
262	IHRT-MS (130±5 days)	P	G086	Bayer			7788		7150	7743	7651	6096	6294	8084	7181	7629	5525											6026
263	IHRT-MS (130±5 days)	CHECK	G103	Hybrid check variety (HCV)	6122	5955	5351	5558	5507	5709	5174	5481	6279	6111														6072
264	IHRT-MS (130±5 days)	A	G025	Nawagam	7095.33	2591	5420	7585	4377	5064	3196		5567	4247			4796											4864
265	IHRT-MS (130±5 days)	V	G027	Dabhoi		5101	3145	5030	5459	5290	6366	2037	5792	4581	6079
266	IHRT-MS (130±5 days)	P	G084	VNR Seeds				6328	4679	3546	6122	4394	5968		4458	7322	8074											7699
267	IHRT-MS (130±5 days)	A	G032	Chiplima	2874.44	2795	2669	4719	6962	4130	4070	4441		5557
268	IHRT-MS (130±5 days)	P	G095	Nuziveedu Seeds		6661	5132	5493	9357		8131	7235	6281		5503													6397
269	IHRT-MS (130±5 days)	P	G067	Advanta				8231		7399	6071	5006	5397	8391		5646	6649
270	IHRT-MS (130±5 days)	A	G031	Bhubaneshwar	3411.33	6348.5	2711	2698	2802	4296	4332			4664
271	IHRT-MS (130±5 days)	V	G003	Karaikal	4132.44	5327	5103	5397	7917	5419		5469	6260
272	IHRT-MS (130±5 days)	V	G049	Allahabad	4310.78	5125		9324	4019	5046			5355	4457
273	IHRT-MS (130±5 days)	A	G052	Masoda			4338	3767						5494	5366	4781	5004											4492
274	IHRT-MS (130±5 days)	A	G036	Ranchi			2995		2182		5368	4002	4651		5977	5096
275	IHRT-MS (130±5 days)	V	G019	Shirgaon						4809	4218	5450	5219	5010			5044											4962
276	IHRT-MS (130±5 days)	A	G044	Arundhatinagar	3979	3813								4956	4626		5246											4280
277	IHRT-MS (130±5 days)	A	G033	Cuttack	5393.11	3753							5572	5071			5285											6447
278	IHRT-MS (130±5 days)	V	G004	Sirsi				3131	4411	4877	4869	5434	4006
279	IHRT-MS (130±5 days)	P	G076	Ankur Seeds										4387	5282	5012	5082											4829
280	IHRT-MS (130±5 days)	A	G009	Bramhavar						3098	5620	2001			3796		5055
281	IHRT-MS (130±5 days)	P	G090	Kaveri Seeds			8778	6762		7267	6798	5398
282	IHRT-MS (130±5 days)	A	G026	Navasari										5001	4036	4272	5636											4857
283	IHRT-MS (130±5 days)	V	G010	Bapatla										5273	5315	6014												5685
284	IHRT-MS (130±5 days)	P	G087	Bio Seeds			7107	8131						7141	5792
285	IHRT-MS (130±5 days)	V	G020	Radhanagari									4911	4476	5133	4515
286	IHRT-MS (130±5 days)	A	G035	Sakoli									4562	4833	4578		6216											5251
287	IHRT-MS (130±5 days)	V	G021	Pondaghat											4385		5062											5016
288	IHRT-MS (130±5 days)	P	G074	Syngenta India	8070.11											5703	5549
289	IHRT-MS (130±5 days)	P	G085	HR International	6887.67								7683
290	IHRT-MS (130±5 days)	P	G091	JK Seeds					4726	6626
291	IHRT-MS (130±5 days)	V	G008	Kathalgere						6290	6249
292	IHRT-MS (130±5 days)	A	G047	Patna				3107		2889
293	IHRT-MS (130±5 days)	V	G048	Pusa			3130										5063
294	IHRT-MS (130±5 days)	A	G013	Rajendranagar	4252.67	4239
295	IHRT-MS (130±5 days)	P	G070	Trimurthy Plant Sciences											6712		7220
296	IHRT-MS (130±5 days)	V	G028	Waraseoni													6510											6260
297	IHRT-MS (130±5 days)	P	G073	Zuari Seeds				8937	10411
298	IHRT-MS (130±5 days)	A	G051	Faizabad		5114
299	IHRT-MS (130±5 days)	V	G016	Gaddipally									7084
300	IHRT-MS (130±5 days)	P	G088	Ganga Kaveri Seeds											6226
301	IHRT-MS (130±5 days)	P	G100	Krishidhan Seeds							8129
302	IHRT-MS (130±5 days)	P	G094	Mahyco Seeds										5301
303	IHRT-MS (130±5 days)	V	G007	Malagi													4951
304	IHRT-MS (130±5 days)	A	G005	Mugad													7754
305	IHRT-MS (130±5 days)	P	G093	Nathbiogene		6767
306	IHRT-MS (130±5 days)	P	G068	Rasi Seeds										7103
307	IHRT-MS (130±5 days)	P	G092	Tierra Seeds													6621
308	IHRT-MS (130±5 days)	V	G024	Vyra	4124.44
309	IHRT-MS (130±5 days)	A	G042	Wangbal					5573
310	IHRT-MS (130±5 days)	V	G007	Malagi																								4446

## Sheet: Sheet3
SHEET 3. Particulars on locations used to test hybrid (F1) genotypes along with inbred local variety checks in different maturity groups, under irrigated ecosystem in the all-India co-ordinated rice improvement experiments performed between 1988 and 2019*
S. No.	LOCATION	Funding	STATE	Latitude	Longitude	ALTITUDE (m above msl)	Soil type	Soil pH	Soil texure
1	Aduthurai	AICRIP	TAMIL NADU	110 01' N	790 E	19.5	ALLUVIAL CLAY	7.5	ALLUVIAL CLAY
2	Allahabad	VOLUNTARY	UTTAR PRADESH	25°27′N	81°51′E	98	SANDY LOAM	6.6	SANDY LOAM
3	Arundhatinagar	AICRIP	TRIPURA	130 11' N	800 25' E	45	RED LOAM	5.3	SANDY LOAM
4	Banswara	VOLUNTARY	RAJASTHAN	29°39′N	91°54′E	980	RED	5.6	LOAM
5	Bapatla	AICRIP	ANDHRA PRADESH	150 54' N	800 28' E	5.49	BLACK SOIL	7.2	CLAY
6	Bhubaneshwar	AICRIP	ODISHA	200 15' N	850 39' E	25.9	SANDY	5.9	SANDY LOAM
7	Bramhavar	AICRIP	KARNATAKA	130 25' N	750 45' E	10	LATERITE	5.5	TEXURED
8	Chakdaha	VOLUNTARY	WEST BENGAL	22°52′N	88°24′E	9	CLAY LOAM	7.3	ALLUVIAL
9	Chatta	AICRIP	JAMMU & KASHMIR	320 40' N	710 50' E	259	CLAY LOAM	7	CLAY LOAM
10	Chinsurah	AICRIP	WEST BENGAL	220 52' N	880 24' E	8.62	CLAY LOAM	7.3	ALLUVIUM
11	Chiplima	AICRIP	ODISHA	200 21' N	800 55' E	178.8	MIXED RED, BLACK & LATERITE	7.2	ALLUVIUM
12	Coimbatore	AICRIP	TAMIL NADU	110 N	760 96 E	426.72	CLAY	7.8	HEAVY
13	Cuttack	AICRIP	ODISHA	200 46 N	850 88 E	23	ALLUVIAL	6.2	CLAY LOAM
14	Dabhoi	VOLUNTARY	GUJARAT	220 07' N	730 25' E	43.13	MEDIUM BLACK	7.9	MEDIUM
15	Dumka	VOLUNTARY	JHARKHAND	240 27' N	870 25' E	137	SANDY LOAM	5.37	SANDY LOAM
16	Faizabad	AICRIP	UTTAR PRADESH	260 47' N	820 15' E	93	ALLUVIUM		NEW AND OLD ALLUVIUM
17	Gaddipally	VOLUNTARY	TELANGANA	170 38' N	780 49' E	505	BLACK COTTON	6.9
18	Gerua	AICRIP	ASSAM	260 11' N	910 17' E	49	ALLUVIAL	5.9	CLAY LOAM
19	Hazaribag	AICRIP	JHARKHAND	230 59' N	820 25' E	614	SANDY LOAM	5.7	SANDY LOAM
20	Hyderabad	AICRIP	TELANGANA	170 31' N	780 16' E	19.47	VERTSOL	7.2	CLAY LOAM
21	Imphal	VOLUNTARY	MANIPUR	240 46' N	930 54' E	774	CLAYEY	5.4	CLAY SAND
22	Jabalpur	VOLUNTARY	MADHYA PRADESH	190 5' N	820 02' E	553.4	MEDIUM BLACK	7.5	SANDY LOAM
23	Jagatiyal	VOLUNTARY	TELANGANA	180 49' N	780 50' E	553.4	RED	7.8	SANDY LOAM
24	Jodhpur	VOLUNTARY	RAJASTHAN	260 24' N	730 02' E	232	RED SOIL
25	Kapurthala	AICRIP	PUNJAB	290 43' N	790 59' E	677	MEDIUM	6	CLAY LOAM
26	Karaikal	VOLUNTARY	PONDICHERY	110 01' N	790 52' E	4	CLAY LOAM	8.6	CLAY LOAM
27	Karjat	AICRIP	MAHARASHTRA	180 55' N	730 18' E	51	MEDIUM BLACK	6.2	CLAY LOAM
28	Karnal	AICRIP	HARYANA	290 43' N	760 58' E	245	SANDY LOAM	9.9	SANDY LOAM
29	Kathalgere	VOLUNTARY	KARNATAKA	250 13' N	750 54' E	258	SILTY CLAY	7.8	VERTISOL
30	Kaul	AICRIP	HARYANA	290 51' N	760 41' E	241	CLAY LOAM	7.8	CLAY
31	Ludhiana	AICRIP	PUNJAB	300 54' N	750 48' E	247	SANDY LOAM	7.7	CLAY LOAM
32	Malagi	VOLUNTARY	KARNATAKA	140 45' N	740 41' E	3	LATERITE	5.8	SANDY LOAM
33	Malan	AICRIP	HIMACHAL PRADESH	320 1' N	760 20' E	950	SILTY CLAY	5.6	SILTY CLAY LOAM
34	Mandya	AICRIP	KARNATAKA	120 45' N	760 48' E	695	RED	6.5	SANDY LOAM
35	Maruteru	AICRIP	ANDHRA PRADESH	160 38' N	810 44' E	0.93	BLACK ALLUVIAL CLAY	7	DELTA ALLUVIAL
36	Masoda	AICRIP	UTTAR PRADESH	260 71' N	820 13' E	105	DELTA ALLUVIAL	7.5	DELTA ALLUVIAL
37	Mugad	AICRIP	KARNATAKA	120 45' N	760 48' E	982	RED	5.8	CLAY SOIL
38	Nagina	AICRIP	UTTAR PRADESH	290 28' N	780 32 E	450	SANDY LOAM	7.5	SILTY CALY LOAM
39	Navasari	AICRIP	GUJARAT	200 57' N	720 4' E	1	CLAY	7.5	CLAY
40	Nawagam	AICRIP	GUJARAT	220 48' N	710 38' E	32.4	MEDIUM BLACK	7.8	SANDY CLAY LOAM
41	New Delhi	VOLUNTARY	NEW DELHI	28°38' N	77°09' E	228.6	MILDLY ALKALINE	7.5-8.5
42	Palghar	VOLUNTARY	MAHARASHTRA	190 45' N	720 41' E	6	MEDIUM BLACK	8.4
43	Pantnagar	AICRIP	UTTAR PRADESH	290 N	790 3' E	243.84	CLAY LOAM	8.1	CLAY LOAM
44	Patna	AICRIP	BIHAR	250 30' N	850 15' E	57.8	ALLIVIAL	7	HEAVY CLAY
45	Pondaghat	AICRIP	MAHARASHTRA	250 59' N	850 40' E	52	SANDY LOAM	8.2	LIGHT
46	Pusa	VOLUNTARY	BIHAR	250 59' N	850 40' E	52	SANDY LOAM	8.2	LIGHT
47	Radhanagari	VOLUNTARY	MAHARASHTRA	210 16' N	800 36' E		ALFOSOL	6.5
48	Raghunathpur	VOLUNTARY	WEST BENGAL	230 54' N	860 67' E	155	ALLUVIAL	6.9	LIGHT
49	Raipur	AICRIP	CHHATTISGARH	210 16' N	800 36' E		INCEPTISOL		SANDY
50	Rajendranagar	AICRIP	TELANGANA	180 5' N	770 05' E	881	CLAY LOAM	7.5	CLAY LOAM
51	Ranchi	AICRIP	JHARKHAND	270 17' N	880 19' E	625	SANDY LOAM
52	Sabour	AICRIP	BIHAR	250 5' N	870 2 E	46	CLAYEE LOAM	7.2	CLAYEE LOAM
53	Sakoli	AICRIP	ODISHA	200 04' N	790 59' E	243	INCEPTISOL	6.6	CLAY LOAM
54	Shirgaon	VOLUNTARY	MAHARASHTRA	150 95' N	740 21 E	764	LATERITE	6.7	PORUS
55	Sindewahi	VOLUNTARY	MAHARASHTRA	200 15' N	790 40' E	222	YELLOW BROWN	6.7	SANDY CLAY
56	Sirsi	VOLUNTARY	KARNATAKA	290 35' N	900 10' E	99.4	OLD ALLUVIAL	5.4	CLAY LOAM
57	Titabar	AICRIP	ASSAM	260 35' N	890 10' E	99.4	OLD ALLUVIAL	5.4	CLAY LOAM
58	Vadgaon	VOLUNTARY	MAHARASHTRA	200 10' N	730 20' E	69	MEDIUM BLACK	7.5	CLAY
59	Varanasi	AICRIP	UTTAR PRADESH	250 20' N	230 03' E	75.7	MEDIUM	7.2	SANDY LOAM
60	Vyra	VOLUNTARY	GUJARAT	200 10' N	730 2' E	187	MEDIUM BLACK	8	CLAY
61	Wangbal	AICRIP	MANIPUR	240 8' N	940 E	731	CLAY LOAM	5.5	FINE
62	Warangal	AICRIP	TELANGANA	180 0' N	790 58' E	881	CLAY LOAM	7.5	SANDY
63	Waraseoni	VOLUNTARY	MADHYA PRADESH	210 45' N	800 50' E	301	SANDY LOAM	7.5
DATA NOT AVAILABLE		PRIVATE (SEED COPMANIES)
1	Advanta	PRIVATE (SEED COPMANIES)
2	Ankur Seeds	PRIVATE (SEED COPMANIES)
3	Bayer	PRIVATE (SEED COPMANIES)
4	Bio Seeds	PRIVATE (SEED COPMANIES)
5	Bisco	PRIVATE (SEED COPMANIES)
6	Dantiwadi Seeds	PRIVATE (SEED COPMANIES)
7	Dev Gen	PRIVATE (SEED COPMANIES)
8	EID Parrys	PRIVATE (SEED COPMANIES)
9	Emergent Genetics	PRIVATE (SEED COPMANIES)
10	Gujarat State Fertilizer Corporation	PRIVATE (SEED COPMANIES)
11	Ganga Kaveri Seeds	PRIVATE (SEED COPMANIES)
12	Hindustan Lever	PRIVATE (SEED COPMANIES)
13	Hybrid Rice International	PRIVATE (SEED COPMANIES)
14	Indo American Hybrids	PRIVATE (SEED COPMANIES)
15	JK Seeds	PRIVATE (SEED COPMANIES)
16	Kaveri Seeds	PRIVATE (SEED COPMANIES)
17	Krishidhan Seeds	PRIVATE (SEED COPMANIES)
18	Mahyco Seeds	PRIVATE (SEED COPMANIES)
19	Namdhari Seeds	PRIVATE (SEED COPMANIES)
20	Nath Seeds	PRIVATE (SEED COPMANIES)
21	Nathbiogene	PRIVATE (SEED COPMANIES)
22	Nirmal Seeds	PRIVATE (SEED COPMANIES)
23	Novartis	PRIVATE (SEED COPMANIES)
24	Nuziveedu Seeds	PRIVATE (SEED COPMANIES)
25	Pan Seeds	PRIVATE (SEED COPMANIES)
26	Paras	PRIVATE (SEED COPMANIES)
27	Parry Monsanto	PRIVATE (SEED COPMANIES)
28	Pioneer seeds	PRIVATE (SEED COPMANIES)
29	Prabhatagri Biotech	PRIVATE (SEED COPMANIES)
30	Pradham Biotech	PRIVATE (SEED COPMANIES)
31	Rasi Seeds	PRIVATE (SEED COPMANIES)
32	Savannah Seeds	PRIVATE (SEED COPMANIES)
33	Sona Genetics	PRIVATE (SEED COPMANIES)
34	Syngenta India	PRIVATE (SEED COPMANIES)
35	Tierra Seeds	PRIVATE (SEED COPMANIES)
36	Trimurthy Plant Sciences	PRIVATE (SEED COPMANIES)
37	Vibhaagrotech	PRIVATE (SEED COPMANIES)
38	VNR Seeds	PRIVATE (SEED COPMANIES)
39	Zuari Seeds	PRIVATE (SEED COPMANIES)

## Sheet: Sheet4
SHEET 4. Table showing address of test locations for hybrid genotypes
S. No.	LOCATION	Funding	STATE	ADDRESS IN INDIA
1	Aduthurai	AICRIP	TAMIL NADU	Aduthurai,Tamil Nadu Rice Research Institute, Aduthurai 612101 Tamil Nadu
2	Allahabad	VOLUNTARY	UTTAR PRADESH	Allahabad, SHUATS, Allahabad Agricultural Institute, Rewa Road Old Bridge, Naini, Prayagraj 211007 Uttar Pradesh
3	Arundhatinagar	AICRIP	TRIPURA	Arundhutinagar, State Agricultural Research Station, Arundhutinagar, Agarthala 799003, Tripura
4	Banswara	VOLUNTARY	RAJASTHAN	Banswara, Agricultural Research Station, (MPUAT), Dohad Road, P.B. No. 25, Borwat Farm, Banswara 327001, Rajasthan
5	Bapatla	AICRIP	ANDHRA PRADESH	Bapatla, Agricultural Research Station, (ANGRAU), Bapatla 522101, Guntur Dt., Andhra Pradesh,
6	Bramhavar	AICRIP	KARNATAKA	Brahmavar, Zonal Agriculture & Horticulture Research Station, Kunjal Road, Brahmavar 576 213 Karnataka
7	Bhubaneshwar	AICRIP	ODISHA	Bhubaneswar, College of Agriculture, OUAT, Bhubaneswar 751003 Odisha
8	Chakdaha	VOLUNTARY	WEST BENGAL	Chakdaha, Bidhan Chandra Krishi Viswavidyalaya, Mohanpur, Nadia 741252 West Bengal
9	Chatta	AICRIP	JAMMU & KASHMIR	Chatta, SKUAST-J, Chatta, Jammu 180009 Jammu & Kashmir
10	Chinsurah	AICRIP	WEST BENGAL	Chinsurah, Rice Research Station, Government of West Bengal, Chinsurah, Hooghly 712102 West Bengal.
11	Chiplima	AICRIP	ODISHA	Chiplima, AICRIP Regional Research and Technology Transfer Station, O.U.A.T., Chiplima, Sambalpur 768025 Odisha
12	Coimbatore	AICRIP	TAMIL NADU	Coimbatore, Tamil Nadu Agricultural University, Coimbatore 641003 Tamil Nadu
13	Cuttack	AICRIP	ODISHA	Cuttack, National Rice Research Institute (NRRI), Cuttack 753006 Odisha
14	Dabhoi	VOLUNTARY	GUJARAT	Dabhoi, Paddy Research Station (Anand Agricultural University), Dabhoi 391110 Gujarat
15	Dumka	VOLUNTARY	JHARKHAND	Dhumka, Krishi Vigyan Kendra , ZARS, PO Khutabandh, Dhumka 814101 Jharkhand
16	Faizabad	AICRIP	UTTAR PRADESH	Faizabad, Narendra Dev University of Agriculture and Technology, Kumarganj, Faizabad224229 Uttar Pradesh
17	Gaddipally	VOLUNTARY	TELANGANA	Gaddipally, Krishi Vigyan Kendra, Gaddipally, Suryapet, Nalgonda 508201 Telangana State
18	Gerua	AICRIP	ASSAM	Gerua, Regional Rainfed Lowland Rice Research Station, Gerua, P.O. Hajo 781102 Assam
19	Hazaribag	AICRIP	JHARKHAND	Hazaribagh, CRURRS (ICAR-NRRI), Post Box- 48, Hazaribag 825301 Jharkhand
20	Hyderabad	AICRIP	TELANGANA	Hyberabad, Indian Institute of Rice Research (IIRR and formerly Directorate of Rice Research (DRR)), Rajendranagar, Hyderabad 500030 Telangana State
21	Imphal	VOLUNTARY	MANIPUR	Imphal, College of Agriculture, Central Agricultural University, Imphal 795004 Manipur
22	Jabalpur	VOLUNTARY	MADHYA PRADESH	Jabalpur, JN Krishi Vishwa Vidhyalaya, Adhartal, Jabalpur 482004 Madhya Pradesh
23	Jagatiyal	VOLUNTARY	TELANGANA	Jagtial, Rice Scheme Regional Agricultural Research Station, Jagtial 505529 Telangana State
24	Jodhpur	VOLUNTARY	RAJASTHAN	Jodhpur, ICAR-ATARI, (CAZRI), Jodhpur 342005 Rajasthan
25	Kapurthala	AICRIP	PUNJAB	Kapurthala, Agricultural Research Station, Dogranwala 144602 Punjab
26	Karaikal	VOLUNTARY	PONDICHERY	Karaikal, PJ Nehru College of Agriculture and Research , Karaikal 609603 Puducherry
27	Karjat	AICRIP	MAHARASHTRA	Karjat, Regional Agricultural Research Station (Dr. BSKKV) Karjat 410 201 Maharashtra
28	Karnal	AICRIP	HARYANA	Karnal , ICAR- Central Soil Salinity Research Institute (CSSRI), Kachwa Road, Karnal 132001 Haryana
29	Kathalgere	VOLUNTARY	KARNATAKA	Kathalegere, Agriculture Research Station, Channagir, Davangere Dt, Kathalegere 577219 Karnataka
30	Kaul	AICRIP	HARYANA	Kaul, CCS-HAU Rice Research Station, Kaul (Kaithal) 136021 Haryana
31	Ludhiana	AICRIP	PUNJAB	Ludhiana, Punjab Agricultural University, Ludhiana 141004 Punjab
32	Malan	AICRIP	HIMACHAL PRADESH	Malan, Rice & Wheat Research Centre, Malan (Kangra) 176047 Himachal Pradesh
33	Malagi	VOLUNTARY	KARNATAKA	Malagi, Agricultural Research Station, Malagi, Uttar Kannada 581116 Karnataka
34	Mandya	AICRIP	KARNATAKA	Mandya, Zonal Agricultural Research Station, V.C.Farm, Mandya 571405 Karnataka
35	Maruteru	AICRIP	ANDHRA PRADESH	Maruteru, APRRI&RARS, Maruteru, West Godavari Dt. 534122 Andhra Pradesh
36	Masoda	AICRIP	UTTAR PRADESH	Masodha, C.R.S., Masodha (NDUAT), Dabhasemar, Faizabad 224133 Uttar Pradesh
37	Mugad	AICRIP	KARNATAKA	Mugad, Agricultural Research Station (UAS Dharwad), Uttara Kannada, 580007 Karnataka
38	Nagina	AICRIP	UTTAR PRADESH	Rice Research Station, Nagina (Bijnore) 246762 Uttar Pradesh
39	Navasari	AICRIP	GUJARAT	Navsari, Main Rice Research Centre (NAU), Aru Cross Road, Vijalpore, Navsari 396450, Gujarat
40	Nawagam	AICRIP	GUJARAT	Nawagam. Main Rice Research Station (AAU), Nawagam, Kheda Dt. 387540 Gujarat
41	New Delhi	VOLUNTARY	NEW DELHI	Indian Agricultural Research Institute, New Delhi 110012
42	Palghar	VOLUNTARY	MAHARASHTRA	Palghar, Agricultural Research Station (Dr BS KKV), Palghar 401404 Maharashtra
43	Pantnagar	AICRIP	UTTAR PRADESH	Pantnagar, College of Agriculture, GBPUA&T, Pantnagar, U.S. Nagar Dt, 263 145 Uttarakhand
44	Patna	AICRIP	BIHAR	Patna, ICAR Research Complex for Eastern Region, ICAR Parisar, Patna 800014 Bihar
45	Pondaghat	AICRIP	MAHARASHTRA	Phondaghat, Agricultural Research Station, Phondaghat, Sindhudurg Dt. 416601 Maharashtra
46	Pusa	VOLUNTARY	BIHAR	Pusa, Rajendra Agricultural University, Pusa, Samastipur 848125 Bihar
47	Radhanagari	VOLUNTARY	MAHARASHTRA	Radhanagari, Agricultural Research Station (MPKV), Radhanagari Dt., Kolhapur 416004 Maharashtra
48	Raghunathpur	VOLUNTARY	WEST BENGAL	Raghunathpur,RRSS, BCKV, Research Institute, Raghunathpur 723133 West Bengal
49	Raipur	AICRIP	CHHATTISGARH	Raipur, Indhira Gandhi Krishi Vidhyalaya, Raipur 492006, Chhattisgarh
50	Rajendranagar	AICRIP	TELANGANA	Rajendranagar,Rice Research Centre ( PJTSAU ), Rajendranagar, Hyderabad 500030 Telangana State
51	Ranchi	AICRIP	JHARKHAND	Ranchi, Birsa Agricultural University, Kanke, Ranchi 834006 Jharkhand
52	Sabour	AICRIP	BIHAR	Bihar Agricultural University, Sabor, Bhagalpur 813210 Bihar
53	Sakoli	AICRIP	ODISHA	Sakoli, Agriculture Research Station, Sakoli, Bhandara Dt., 441802 Maharashtra
54	Shirgaon	VOLUNTARY	MAHARASHTRA	Shirgaon, Agricultural Research Station, Shirgaon, Ratnagiri Dt. 415629 Maharashtra
55	Sindewahi	VOLUNTARY	MAHARASHTRA	Sindewahi, Agriculture Research Station, Dr.PDKV, Sindewahi, Chandrapur Dt. 441222, Maharashtra
56	Sirsi	VOLUNTARY	KARNATAKA	Sirsi, Agricultural Research Station, Sirsi, Uttara Kannada 581401 Karnataka
57	Titabar	AICRIP	ASSAM	Titabar, Regional Agricultural Research Station (AAU), Titabar 785630 Assam
58	Vadgaon	VOLUNTARY	MAHARASHTRA	Vadgaon, Agriculture Research Station, Vadgaon, Maval Tq, Maval Dt, Pune 412 106 Maharashtra
59	Varanasi	AICRIP	UTTAR PRADESH	Varanasi, Institute of Agricultural Sciences (BHU) Varanasi 221005 Uttar Pradesh
60	Vyra	VOLUNTARY	GUJARAT	Vyara, Regional Rice Research Station, Vyara, Tapi Dt. 394650 Gujarat
61	Wangbal	AICRIP	MANIPUR	Wangbal, Rice Research Station, Wangbal 795138 Manipur
62	Warangal	AICRIP	TELANGANA	Warangal, Regional Agricultural Research Station (PJTSAU), Mulugu Road, Warangal 506007 Telangana State
63	Waraseoni	VOLUNTARY	MADHYA PRADESH	Waraseoni, Regional Agricultural Research Station (JNKVV), Waraseoni, Balaghat 481331 Madhya Pradesh
		PRIVATE SEED COPMANIES
1	NA	Advanta	TELANGANA	Advanta Limited, Krishnama House, # 8-2-418, 3rd Floor, Road No -7, Banjara Hills, Hyderabad 500034 Telangana State
2	NA	Ankur Seeds	MAHARASHTRA	Ankur Seeds Pvt. Ltd., 27, New Cotton Market Lay-out, Opp. Bus Station, Nagpur 440018 Maharashtra.
3	NA	Bayer	TELANGANA	Bayer Bio-Science Pvt Ltd Plot No.13, Survey No: P64/2 , Software Units Layout, Madhapur, Hyderabad 500081 Telangana State
4	NA	Bio Seeds	TELANGANA	Bioseed Research India, 234, B-Block, Kavuri Hills, Phase II, Hyderabad 500033 Telangana State
5	NA	Bisco	TELANGANA	Bisco Bio-Sciences Pvt. Ltd., Ashoka My Home Chambers, H.No. 1-8-201 to 203, Flat no. 208 & 209, S.P. Road, Secunderabad 500003 Telangana State
6	NA	Dantiwadi Seeds	GUJARAT	Dantiwada Seed Private Ltd, # 211, Sakar V, B/H Natraj Cinema, Ashram Road, Ahmedabad 380 009 Gujarat
7	NA	Dev Gen	TELANGANA	DeVGen Seeds & Crop Technology, Pvt., Ltd., 7c Surya Towers, 105 S.P. Road, Secunderabad 500003 Telangana State
8	NA	EID Parrys	TAMIL NADU	EID Parry (India) Ltd., Dare House, New No 2, Old 23, NSC Bose Road, Chennai 600001 Tamil Nadu.
9	NA	Emergent Genetics	TELANGANA	Emergent Genetics Ltd,, 8-2-120/86/5 Avenue 7, Road 3, Banjara Hills 500034 Hyderabad, Telengana State.
10	NA	Gujarat State Fertilizer Corporation	TELANGANA	Gujarat State Fertilizers & Chemicals Ltd, 10-1-18/45/1, Shyamnagar Colony, Saifabad, Hyderabad 500004 Telangana State
11	NA	Ganga Kaveri Seeds	TELANGANA	Ganga Kaveri Seeds Pvt. Ltd, # 1406, Babukhan Estate, Basheerbagh, Hyderabad 500001 Telangana State
12	NA	Hindustan Lever	MAHARASHTRA	Hindustan Lever, Hindustan Lever House, Backbay Reclamation, Mumbai 400020 Maharashtra.
13	NA	Hybrid Rice International	TELANGANA	Hybrid Rice International, Pvt., Ltd., 8-1-364/30 Deluxe Colony, Mehdipatnam, Hyderabad 500028 Telangana State
14	NA	Indo American Hybrids	TELANGANA	Indo-American Hybrid Seeds (I) Pvt. Ltd. Flat # 203, KJ Residency Hydershkote (Near ZPHS) Golconda post office, Hyderabad 500 008 Telangana State
15	NA	JK Seeds	TELANGANA	JK Agri Genetics Ltd., 1-10-177, 4th Floor, Varun Towers, Begumpet, Hyderabad 500016 Telangana State.
16	NA	Kaveri Seeds	TELANGANA	Kaveri Seed Company Ltd, 513-B, V Floor, Minerva Complex, S.D. Road, Secunderabad 500 003 Telangana State
17	NA	Krishidhan Seeds	MAHARASHTRA	Krishidhan Seeds Pvt Ltd, 7th Floor, Tower-15, Cybercity, Magarpatta City, Hadapsar, Pune 411 013 Maharashtra
18	NA	Mahyco Seeds	TELANGANA	Mahyco, Maharashtra Hybrid Seeds Co. Ltd. National Highway No. 7, Hyderabad–Nagpur Road, Village Kallakal, Medak 502336 Telangana State
19	NA	Namdhari Seeds	KARNATAKA	Namdhari Seeds Pvt. Ltd., Sri Sai Arcade, No. 8, 12th Cross 1st Phase, Ideal Homes Township, Rajarajeshwari Nagar, Bangalore 560 098, Karnataka
20	NA	Nath Seeds	MAHARASHTRA	Nath seeds Co. Block No261, Samarth Nagar, Samarth Nagar, Aurangabad 431001 Maharashtra
21	NA	Nathbiogene	MAHARASHTRA	Nath Bio-Genes (I) Ltd., Nath House, Nath Road, P.B. No. 318 Aurangabad 431005 Maharashtra
22	NA	Nirmal Seeds	MAHARASHTRA	Nirmal Seeds Pvt. Ltd., Bhadgaon Road, Pachora, Jalgaon Dt, 424 201 Maharashtra
23	NA	Novartis	MAHARASHTRA	Novartis India, Seed House, 1170 Revenue Colony, Shivajinagar, Pune 411005 Maharashtra
24	NA	Nuziveedu Seeds	TELANGANA	Nuziveedu Seeds Limited, Survey No. 69, Kandlakoya, Gundla Pochampally Villege, Medchal Mandal, RR Dt. 501401 Telangana State
25	NA	Pan Seeds	WEST BENGAL	Pan Seeds Pvt., Suite 15, 2nd floor, 2, N.C.DuttaSarani, Kolkata 700 001 West Bengal
26	NA	Paras	UTTARAKHAND	Paras Seeds Pct., Ltd., Jaspur Road Kashipur, Udhamsinghnagar 2444713 Uttarakhand
27	NA	Parry Monsanto	KARNATAKA	Parry Monsanto Pvt., Ltd., 44/2A Bellary Road, NH 7, Hebbal Bangalore Karnataka
28		Pioneer seeds	TELANGANA	Pioneer Overseas Corporation India branch). 3-4 floor, Babukhans Millennium Centre, havan Road, Somajiguda, Hyderabad 500082
29	NA	Prabhatagri Biotech	TELANGANA	PrabhatAgri Biotech Ltd, #8-2-227/45, 1st Floor, UBI Colony, Road No. 3, Banjara Hills, Hyderabad 500034 Telangana State
30	NA	Pradham Biotech	TELANGANA	Pradham Biotech, 207, Orange Block, My Home Rainbow Complex, Tolichowki, Hyderabad 500008 Telangana State
31	NA	Rasi Seeds	TELANGANA	Rasi Seeds (P) Ltd Sri Sai Silica, Plot No. 1- 98/K#19,Krithica Layout, Near Nisum Technologies, Arunodaya Colony, Madhapur, Hyderabad 500081 Telangana State
32	NA	Savannah Seeds	TELANGANA	Savannah Seeds Pvt Ltd, H.No. 12-2-823/A/128/1, Santosh Nagar Colony, Mehdipatnam, Hyderabad 500028 Telangana State
33	NA	Sona Genetics	GUJARAT	Sona Genetics, Pvt, Ltd., Shitiratna Complex, Panchvati, Chimanlal Girdharlal Rd, Ellisbridge, Ahmedabad 380006 Gujarat
34	NA	Syngenta India	TELANGANA	Syngenta India Limited, Plot No. 9-1-164/A 4th Floor, Amsuri Faust, S.D. Road, Near Clock Tower, opp Sigma Hospitals, Secunderabad 500025 Telangana State
35	NA	Tierra Seeds	TELANGANA	Tierra Seed Science Pvt Ltd, Malaxmi Courtyard, Khajaguda, Golconda Post, Hyderabad 500008 Telangana State
36	NA	Trimurthy Plant Sciences	TELANGANA	TriMurti Plant Sciences Pvt Ltd, # 101, MGR Estates, Dwarakapuri Colony, Panjagutta, Hyderabad 500082 Telangana State
37	NA	Vibhaagrotech	TELANGANA	Vibhaagrotech, Ltd., 501 Subhan Sirisampada, Rajbhavan Road, Somajiguda, Hyderabad 500082 Telangana State
38	NA	VNR Seeds	CHHATTISGARH	VNR Seeds Pvt. Ltd., First floor, Ratnagiri, Opp RajKumar Cllege, G.E. Road, Raipur 492 001 Chattisgarh
39	NA	Zuari Seeds	TELANGANA	Zuari Seeds Ltd, Y S Rao Chamber, 1-10-77, Ashoknagar, Hyderabad 500020 Telangana State
